# Supplementary material for: Biogas Production Optimization in the Anaerobic Codigestion Process: A Critical Review on Process Parameters Modeling and Simulation Tools
Source: Hindawi journal article supplement (doi:10.1155/2024/4599371), 2024-04-08
Supplement: f1 [file 4599371.f1.docx]

1. **Methodology and Data Filtration Criteria**
   1. **Literature Search**

To accomplish the objectives of the review paper, peer-reviewed journals across the globe were browsed from online databases such as Scopus, Google Scholar, Science Direct, and Web of Science between September 2021-August 2023. The search keywords such as: ‘anaerobic co-digestion modelling’, ‘organic wastes anaerobic co-digestion’, ‘biogas process simulation’, ‘kinetic models in anaerobic digestion’, ‘artificial neural network (ANN) and anaerobic co-digestion’, ‘genetic algorithm (GA) and anaerobic co-digestion’, ‘lignocellulosic biomass and anaerobic co-digestion’, ‘food wastes biodegradation’, ‘biogas process optimization’, ‘enhancements of biogas yield’, biogas process inhibitions’, ‘biomethane potentials’, ‘reactors types’, ‘working bioreactor volumes’, ‘methane production and methanogens’, ‘C/N ratio’, ‘inoculum to substrate ratios’, and ‘hydraulic retention time’ were utilized to search articles published in the English language. Most of the articles collected were ranged from 2014 to the present to ensure that the studies were pertinent in terms of time duration. To elaborate on the role of process parameters and kinetic models, articles published since 1990s were incorporated besides the most recently published ones particularly those related to computer-based AcoD process simulations.

Articles published between 1990 and 2011 were filtered for their basic elaboration on the basic principles of anaerobic digestion and AcoD processes. During the past ten years (2013-2023), kinetic modelling and computer programs-based process simulations of AcoD were highly studied. From these articles, the role of process parameters and kinetic and simulation modelling on biogas production via AcoD were analysed and described. To filter out papers out of the scope of this review article**,** first, the duplicated data and the pre-proof reports were rejected. Then, reports unrelated to the current review paper were filtered out by applying the abstract filter approach. Lastly, papers not significantly important for this work were removed by reading through the collected articles. In doing so, 134 papers were selected from the 425 published papers collected for the review analysis. The filtered articles were organized and managed using the Mendeley desktop software. Data (results) used in this discussion were obtained directly from tables, plots, and written information from the selected papers. To the best of the authors' knowledge, literatures integrating AI-based algorithms and process parameters in modelling the AcoD process are very limited or non-existent. **Figure 1** shows the methodological approaches used in this study.


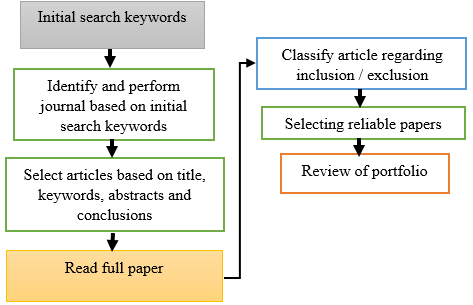


**Figure 1**: Methodological approach utilized in literature search and filtration steps.
